# Supplementary material for: An object-based and Lagrangian view on an intense hailstorm day in Switzerland as represented in COSMO-1E ensemble hindcast simulations
Source: Copernicus journal article supplement (doi:10.5194/wcd-6-645-2025), 2025-06-24
Supplement: Supplementary file 1 [file wcd-6-645-2025-supplement.zip]

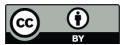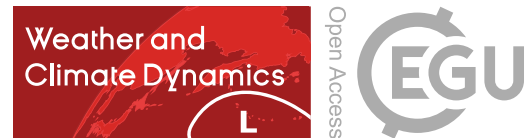

*Supplement of*

## **An object-based and Lagrangian view on an intense hailstorm day in Switzerland as represented in COSMO-1E ensemble hindcast simulations**

**Killian P. Brennan et al.**

*Correspondence to:* Killian P. Brennan ([killian.brennan@env.ethz.ch](mailto:killian.brennan@env.ethz.ch))

- [wcd-6-645-2025-supplement-title-page.pdf](#)
- [animation\\_egusphere-2024-2148.gif](#)

The copyright of individual parts of the supplement might differ from the article licence.
